1 **Temperature drives the evolution and global distribution of avian eggshell colour**

2

3 Phillip A. Wisocki<sup>1</sup>, Patrick Kennelly<sup>1</sup>, Indira Rojas Rivera<sup>1</sup>, Phillip Cassey<sup>2</sup>, Daniel Hanley<sup>1\*</sup>

4

5 <sup>1</sup>Long Island University – Post, 720 Northern Boulevard, Brookville, NY 11548, USA

6 <sup>2</sup>School of Earth and Environmental Sciences, University of Adelaide, SA 5005, Australia

7

8 \*email: [daniel.hanley@liu.edu](mailto:daniel.hanley@liu.edu)

9 **The survival of a bird's egg depends upon its ability to stay within strict thermal limits.**  
10 **Avian eggshell colours have long been considered a phenotype that can help them stay**  
11 **within these thermal limits<sup>1,2</sup>, with dark eggs absorbing heat more rapidly than bright eggs.**  
12 **Although disputed<sup>3,4</sup>, evidence suggests that darker eggs do increase in temperature more**  
13 **rapidly than lighter eggs, explaining why dark eggs are often considered as a cost to trade-**  
14 **off against crypsis<sup>5-7</sup>. Although studies have considered whether eggshell colours *can* confer**  
15 **an adaptive benefit<sup>4,6</sup>, no study has demonstrated evidence that eggshell colours *have***  
16 **actually adapted for this function. This would require data spanning a wide phylogenetic**  
17 **diversity of birds and a global spatial scale. Here we show evidence that darker and**  
18 **browner eggs have indeed evolved in cold climes, and that the thermoregulatory advantage**  
19 **for avian eggs is a stronger selective pressure in cold climates. Temperature alone**  
20 **predicted more than 80% of the global variation in eggshell colour and luminance. These**  
21 **patterns were directly related to avian nesting strategy, such that all relationships were**  
22 **stronger when eggs were exposed to incident solar radiation. Our data provide strong**  
23 **evidence that sunlight and nesting strategies are important selection pressures driving egg**  
24 **pigment evolution through their role in thermoregulation. Moreover, our study advances**  
25 **understanding of how traits have adapted to local temperatures, which is essential if we are**  
26 **to understand how organisms will be impacted by global climate change.**

27

28 The impact of global climate patterns on the evolution and distribution of traits is an area of  
29 increasing importance as global temperatures continue to rise. Birds' eggs are an ideal system for

30 exploring the intersection between climate and trait diversity, because a tight thermal range is  
31 necessary for the survival of the developing embryo<sup>8</sup>, as eggs are unable to regulate their own  
32 temperature<sup>9</sup>. As a result, many birds have adapted incubation behaviours and nest characteristics  
33 in response to local conditions<sup>10,11</sup>. In addition to these behavioural adaptations, the adaptive  
34 value of eggshell coloration for thermoregulation has been of longstanding interest<sup>1,2,5</sup>. These  
35 eggshell colours are generated by just two pigments<sup>12</sup> and eggshell coloration is known to reflect  
36 local environmental conditions<sup>13</sup>.

37         The white colour found on many eggs (e.g., ostrich eggs) reflects incident solar radiation  
38 from their surfaces, but can draw the attention of predators<sup>14</sup>. By contrast, dark brown or heavily  
39 speckled eggs (e.g., arctic loon eggs) may escape the visual detection of predators, particularly in  
40 ground nesting birds<sup>15</sup>, but these darker eggs should heat more rapidly when left in the sun<sup>1,16</sup>.  
41 Therefore, in hot climes the thermal costs must be balanced against the adaptive benefits of  
42 cryptic pigmentation, while in cold climes thermoregulation and crypsis provide synergistic  
43 benefits to birds laying dark brown eggs. Thus, the potential trade-off between thermal  
44 constraints and crypsis are not equivalent across the globe; eggs found near the poles should be  
45 darker, while those found near the equator should have higher luminance (appear brighter) and  
46 more variable colours. The strength of these relationships should covary with nest types, such  
47 that they are stronger in nests exposed to more light.

48         To examine these ecogeographic patterns, we quantified egg colours across their known  
49 geographic ranges. To accomplish this we generated coordinates of avian eggshell coloration  
50 within an opponent colour space spanning 634 species, representing 32 of the extant 36 orders of  
51 birds<sup>17</sup> (Fig. 1). Coordinates within this space correspond with avian perceived colour and  
52 luminance (brightness), and they directly relate to physical metrics of colour (see Methods).

53 Then, we simulated random nests ( $n = 3,577,243$ ) within each species' breeding range and  
54 assigned each species' eggshell colour and luminance. Next, we calculated the phylogenetic  
55 mean colour and luminance (Fig. 1) for species found within each sampling area of an equal area  
56 hexagonal grid, and associated annual temperature, and other climatic variables, with these  
57 eggshell phenotypes. We then used a spatial Durbin error model to predict eggshell colours and  
58 luminance values by climate variables to account for spatial autocorrelation. Lastly, to explore  
59 the direct effects of solar heating on eggshell colours, we tested the heating and cooling rates of  
60 white, blue-green, and brown *Gallus gallus domesticus* eggs under natural sunlight conditions.

61

62 **Fig. 1. An opponent colour space**  
63 **illustrating the avian perceivable**  
64 **variation in eggshell coloration.**

65 These data are based on the difference between two opponent channels (colour) and avian  
66 perceivable luminance. Inset eggs  
67 represent where three distinct  
68 eggshell colour morphs fall within  
69 this space. We illustrate the locations  
70 for eggshell colours for the black  
71 tinamou *Tinamus osgoodi*, peregrine  
72 falcon *Falco peregrinus*, and Olive  
73 sparrow *Arremonops rufivirgatus*,  
74 representing blue-green, brown, and  
75 white egg colours, respectively. Each  
76 egg is depicted alongside a 1 cm scale  
77 bar.

78  
79  
80

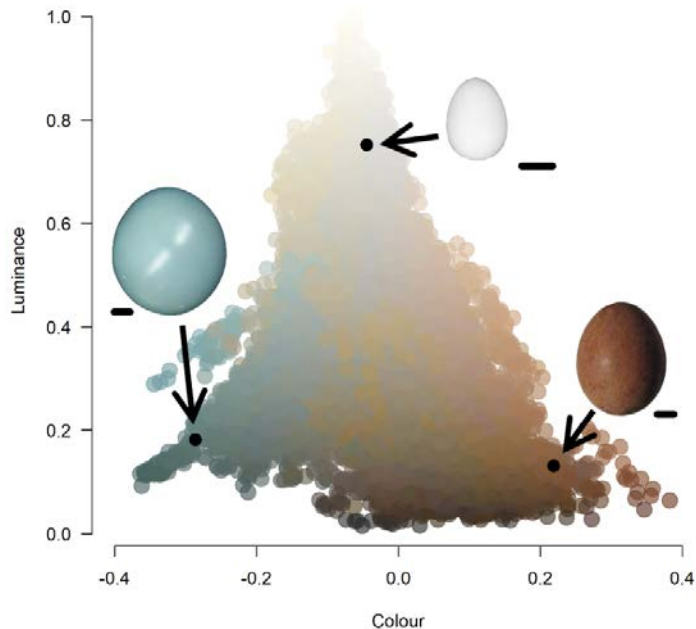

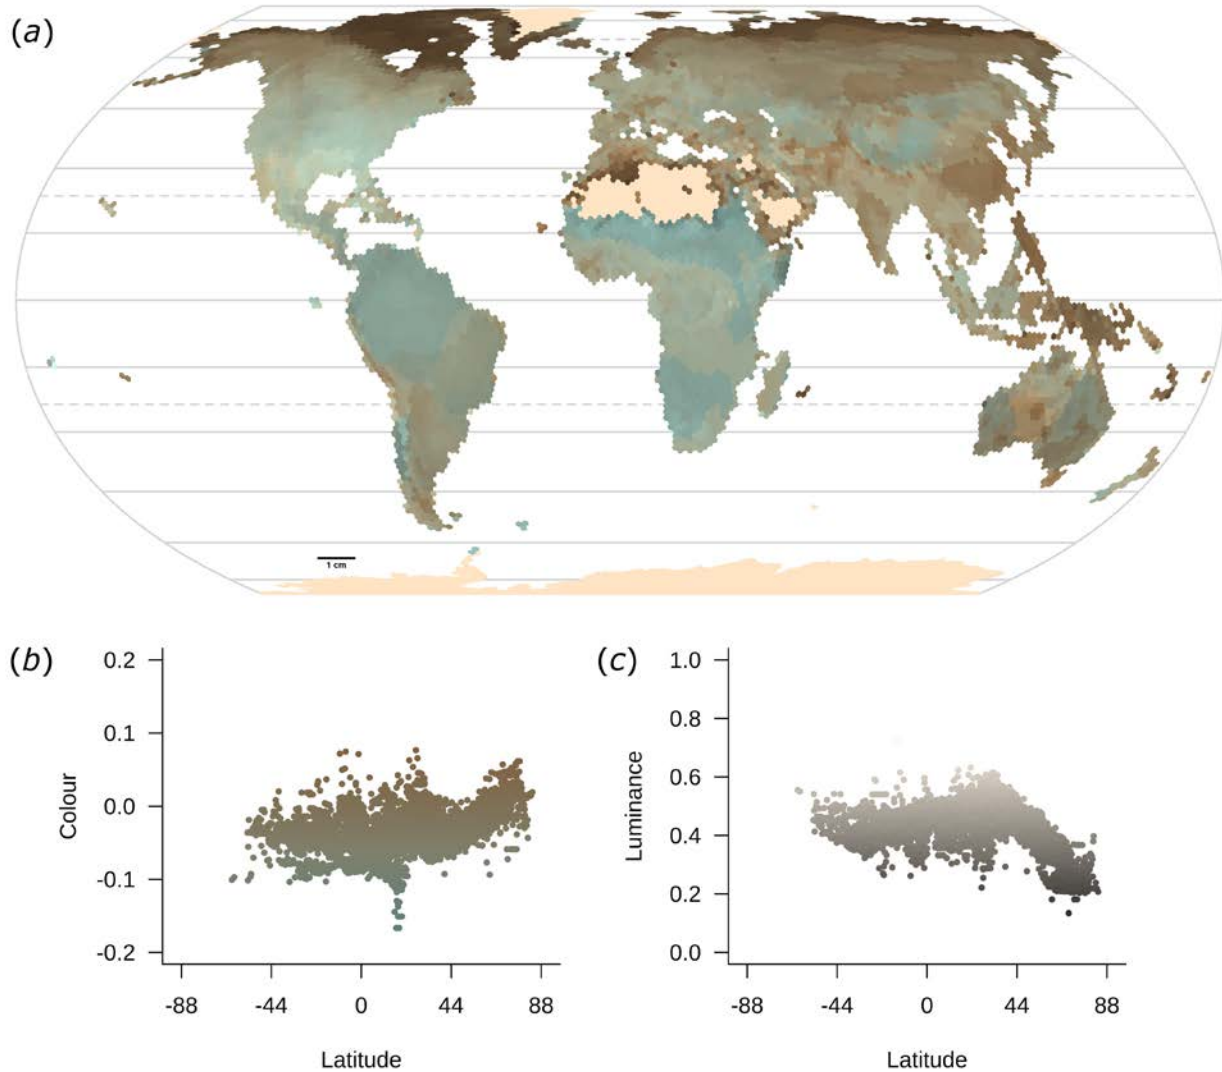

81

82 **Fig. 2. An equal Earth projection of the global distribution of avian eggshell colour.**

83 Depicted in a **a**, bivariate plot illustrating continuous variation in blue-green to brown

84 eggshell and dark to light eggshell colours, in units of standard deviation from their means.

85 Both avian perceived **b**, *colour* ( $R^2 = 0.83$ , *latitude*:  $z = -0.06$ ,  $p = 0.95$ ; *latitude*<sup>2</sup>:  $z = 4.67$ ,  $p <$

86  $0.0001$ ) and **c**, *luminance* ( $R^2 = 0.88$ , *latitude*:  $z = 2.08$ ,  $p = 0.04$ ; *latitude*<sup>2</sup>:  $z = -9.26$ ,  $p <$

87  $0.0001$ ) vary non-linearly across latitude, such that dark brown eggs are more likely at northerly

88 latitudes.

89

90 We found that avian eggshell colours are darker and browner near the Arctic, and have greater

91 luminance and more variable colours near the equator (Fig. 2). Temperature accounted for 83.3%

92 and 88.0% of the variance in avian egg colour and luminance, respectively, with higher latitudes

93 having significantly browner (*temperature*:  $z = -5.29$ ,  $p < 0.0001$ ; *temperature*<sup>2</sup>:  $z = 2.04$ ,  $p =$

94 0.04) and darker eggs (*temperature*:  $z = 13.32$ ,  $p < 0.0001$ ; *temperature*<sup>2</sup>:  $z = -8.50$ ,  $p < 0.0001$ ).  
95 These striking, nonlinear relationships with latitude and temperature suggest that avian eggshell  
96 colours are adaptive for thermal regulation in cold climates, but not in other environments. In  
97 support of this, we found direct linear associations between annual temperature and eggshell  
98 colour and brightness within two distinct climate regions that are associated with cold climates  
99 (*colour*:  $R^2 = 0.82$ ,  $z = -9.30$ ,  $p < 0.0001$ ; *luminance*:  $R^2 = 0.94$ ,  $z = 14.79$ ,  $p < 0.0001$ ; Fig.  
100 3a,b), while those patterns are weaker in other climate regions (*colour*:  $R^2 = 0.79$ ,  $z = -3.03$ ,  $p =$   
101  $0.002$ ; *luminance*:  $R^2 = 0.72$ ,  $z = 0.59$ ,  $p = 0.56$ ; Fig. 3c,d). Although the role of thermoregulation  
102 in driving egg colour evolution has long been proposed as an important selective pressure<sup>1,2</sup>, dark  
103 brown colours are often considered costly because egg temperatures are maintained close to their  
104 upper thermal limit<sup>4</sup>; thus, brown colours would be counterproductive to shedding incident heat.  
105 Instead, our results illustrate that this classic trade-off is dependent upon geography, where  
106 brown colours are adaptive for thermoregulation in only some places on Earth.

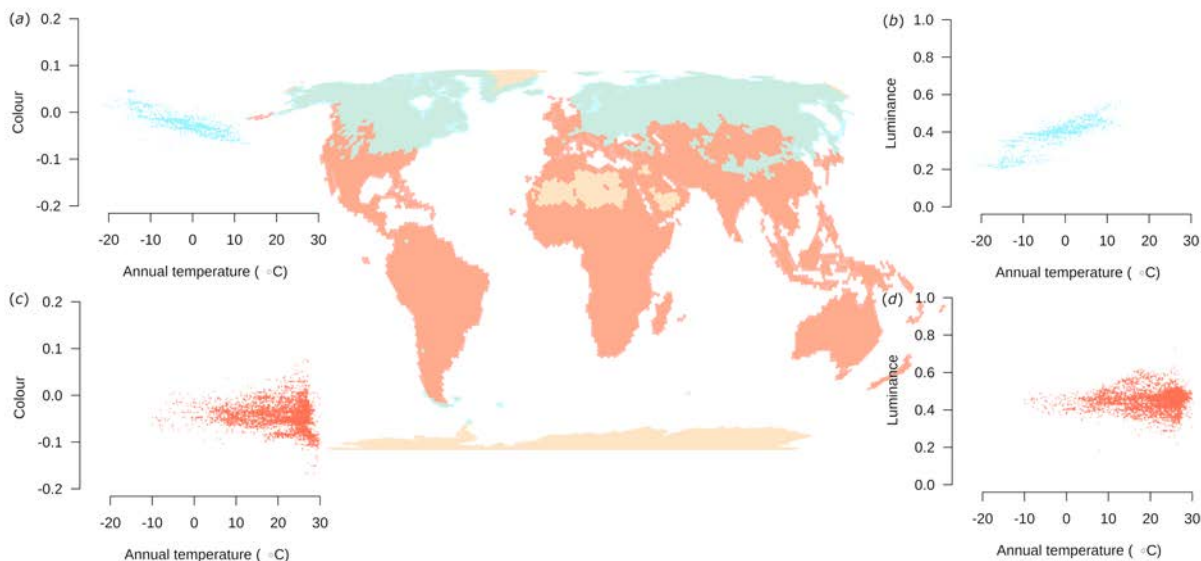

107  
108 **Fig. 3. Global relationship between temperature and eggshell colour and luminance.**  
109 Variation in avian perceived **a,c**, colour and **b,d**, luminance in **a-b**, cold Köppen climate regions  
110 (blue dots,  $n = 2,159$ ) compared to **c-d**, other ecoregions (pink dots,  $n = 4,523$ ). The central  
111 inset depicts those climate regions on the Earth. See Fig. 1 and methods for details.

112 Using a linear model, and under natural solar radiation, luminance and egg mass  
113 explained 91% of the variance in surface heat gain ( $F_{2,45} = 232.70$ ,  $R^2_{\text{adj}} = 0.91$ ,  $p < 0.0001$ ;  
114 *luminance*:  $z = -1.70$ ,  $p < 0.0001$ ; *mass*:  $z = 0.45$ ,  $p = 0.003$ ), while colour and mass only  
115 predicted 71% of the variance ( $F_{2,45} = 58.85$ ,  $R^2_{\text{adj}} = 0.71$ ,  $p < 0.0001$ ; *colour*:  $z = 1.15$ ,  $p <$   
116  $0.0001$ ; *mass*:  $z = 0.53$ ,  $p = 0.0005$ ;  $\Delta\text{AICc} = 55$ ; Fig. 4). Specifically, dark brown eggs heated  
117 faster ( $7.28 \text{ }^\circ\text{C h}^{-1}$ ;  $F_{3,44} = 127.3$ ,  $R^2_{\text{adj}} = 0.89$ ,  $p < 0.0001$ ) than light brown ( $6.78 \text{ }^\circ\text{C h}^{-1}$ ;  $p =$   
118  $0.006$ ), blue-green ( $5.71 \text{ }^\circ\text{C h}^{-1}$ ;  $p < 0.0001$ ), or white eggs ( $4.17 \text{ }^\circ\text{C h}^{-1}$ ;  $p < 0.0001$ ) and retained  
119 heat longer (Extended Data Fig. 1a). This evidence suggests that pigmentation is an important  
120 factor in egg thermoregulation, such that darker eggs are more adaptive than lighter eggs in  
121 colder climes, especially in exposed nests. Because darker brown colours are more common in  
122 the coldest places, our findings suggest that the dark brown eggshell pigment, protoporphyrin,  
123 provides a greater thermal adaptive benefit than the blue-green eggshell pigment, biliverdin.  
124 Thus, birds may adapt an optimal colour to their locale.

125

126

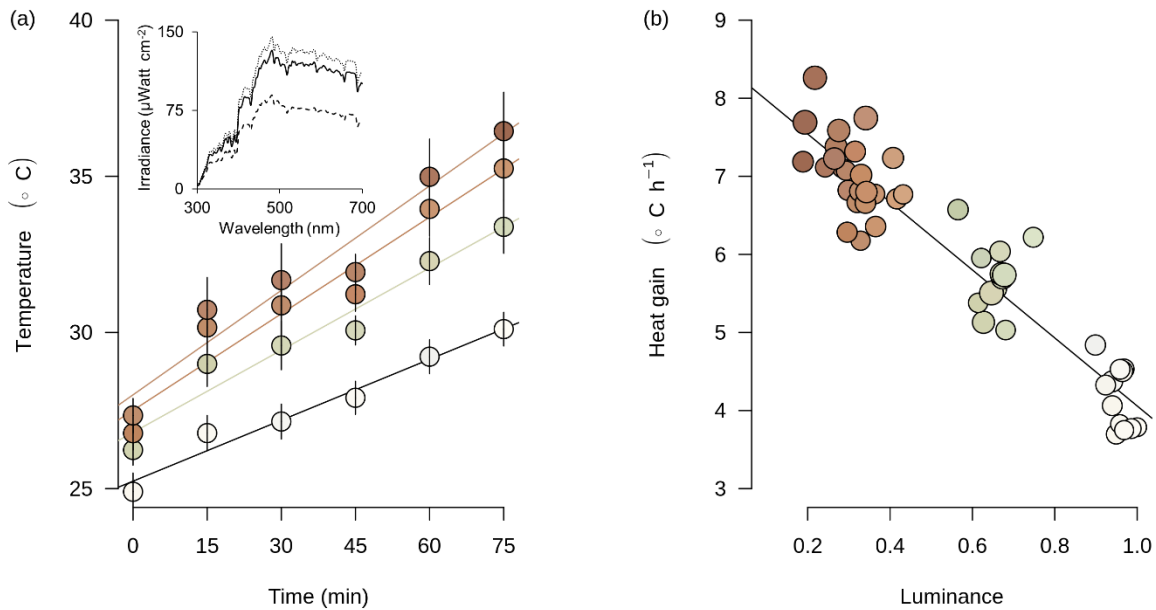

127

128 **Fig. 4. Eggshell heat gain.** The heat gain  $\pm$  s.e. for **a**, white, blue, light brown, and dark  
129 brown (bottom to top) chicken *Gallus gallus domesticus* eggs left outside at 27°C. The eggs were  
130 exposed to direct sunlight, except for cloud cover between 30-45 minutes after the start of the  
131 experiment (note the negative residuals at 45 minutes for each line). Inset includes solar  
132 irradiance measures at the start (solid black line), end (dotted grey line), and during cloudy  
133 conditions (dashed line) of the experiment. We also plot the **b**, eggshell surface heat gain in °C  
134 h<sup>-1</sup> over this 75 min period, for each egg-based luminance and mass (dot size) illustrates relative  
135 egg sizes).

136

137 In cold climates, the ability to maintain temperature for longer periods of time afforded

138 by darker coloration is particularly important<sup>18</sup>. This is not to say that species laying exposed

139 eggs will leave their eggs unattended for longer, but instead, when unattended, dark eggs would

140 have greater heat retention over comparable time periods. Eggshell pigmentation thus can confer

141 an additional advantage over the chill tolerance found in some species<sup>8</sup>. By contrast, in warmer

142 climates dark eggs might be more costly because they heat relatively quickly (e.g., nearly twice

143 as fast as white eggs). In these environments, species are subjected to competing selection

144 pressures and while eggs may have greater luminance (less pigmentation) in these warmer climes

145 the colour is likely impacted by a range of other selective pressures: solar filtration<sup>5,19</sup>, anti-

146 microbial defence<sup>20</sup>, signalling of mate quality<sup>21</sup>, and egg recognition<sup>22</sup>. Additionally, crypsis<sup>7</sup>  
147 and eggshell strength<sup>23</sup> are known to influence egg coloration, and are likely important selective  
148 pressures globally. This interpretation is supported by our data. Egg colour was increasingly  
149 variable nearer the equator, indicating other selective pressures (e.g., ecological or behavioural)  
150 are acting on eggshell coloration.

151 As predicted, the strength of these relationships varied with nest types that experience  
152 differing levels of solar irradiance, such that the ability for temperature to predict colour and  
153 brightness was strongest in ground nesting birds which are exposed to the most light (*colour*:  $R^2$   
154 = 0.77,  $z = -7.82$ ,  $p < 0.0001$ ; *brightness*:  $R^2 = 0.77$ ,  $z = 9.63$ ,  $p < 0.0001$ ), was weaker in cup  
155 nesting birds that often nest in dense foliage (*colour*:  $R^2 = 0.62$ ,  $z = 8.68$ ,  $p < 0.0001$ ; *brightness*:  
156  $R^2 = 0.78$ ,  $z = 10.93$ ,  $p < 0.0001$ ), and was weakest in cavity nests entirely enclosed from light  
157 (*colour*:  $R^2 = 0.68$ ,  $z = -1.02$ ,  $p = 0.31$ , *brightness*:  $R^2 = 0.75$ ;  $z = 2.46$ ,  $p = 0.01$ ). Interestingly,  
158 recent research has documented that in non-avian dinosaurs these two eggshell pigments  
159 emerged in species employing exposed nesting strategies<sup>24</sup>. This evidence suggests that nesting  
160 ecology was a pervasive and important selective pressure driving the evolution and distribution  
161 of eggshell colours.

162 The chemical properties of eggshell pigments underlying eggshell colours may have  
163 adapted in response to other environmental forces. For example, eggshell pigments may protect  
164 the developing embryo's DNA from ionizing radiation, due to their absorption peaks in the UV  
165 range<sup>5</sup>. The blue-green pigment, biliverdin, absorbs more UV light than protoporphyrin (the  
166 brown pigment)<sup>5</sup>; therefore, we would expect more intense blue-green coloration in locales with  
167 high UVB radiation. Cold regions had on average 3.4 times less average monthly UVB radiation  
168 (mean UVB  $\pm$  s.e.; *cold*:  $276.54 \pm 4.24$  kJ·m<sup>-2</sup>; *other*:  $943.82 \pm 3.68$  kJ·m<sup>-2</sup>) than other regions<sup>25</sup>,



169 yet in both regions blue-green eggs were associated with locales with higher UVB and the  
170 relationship was strongest in cold climes which have lower UVB levels (*cold*:  $R^2 = 0.82$ ,  $z =$   
171  $-7.54$ ,  $p < 0.0001$ ; *other*:  $R^2 = 0.79$ ,  $z = -4.28$ ,  $p < 0.0001$ ). Similarly, luminance was only  
172 related to UVB levels in cold climes (*cold*:  $R^2 = 0.94$ ,  $z = 11.24$ ,  $p < 0.0001$ ; *other*:  $R^2 = 0.72$ ,  $z =$   
173  $0.44$ ,  $p = 0.66$ ), suggesting that these relationships are driven by the strong correlation between  
174 UVB and temperature ( $r = 0.91$ ,  $CI_{0.95} = 0.91$  to  $0.92$ ,  $p < 0.0001$ ). Differentiating the  
175 independent selection pressures exerted by either is an important area of future research.

176 It is also possible that protoporphyrin protects the egg from microbial invasion because  
177 protoporphyrin has photo-dependent anti-microbial activity<sup>20,26</sup>. Because microbial loads are  
178 associated with humidity<sup>27</sup>, we expect to find browner eggs in more humid places. However,  
179 although we found that in cold regions humidity significantly predicted eggshell colour ( $R^2 =$   
180  $0.79$ ,  $z = 3.80$ ,  $p < 0.0002$ ) and luminance ( $R^2 = 0.93$ ,  $z = -2.57$ ,  $p = 0.01$ ), these patterns were  
181 not as strong in other climate regions where the risk of microbial infection would be expected to  
182 be higher (*colour*:  $R^2 = 0.79$ ,  $z = 2.20$ ,  $p = 0.03$ ; *luminance*:  $R^2 = 0.72$ ,  $z = 0.56$ ,  $p = 0.58$ ).  
183 Overall, our results indicate that temperature is the main selective pressure driving avian eggshell  
184 colour in colder northern climates, and that other selective pressures may be more important at  
185 warmer climates.

186 Here we provide a robust analysis across the full phylogenetic diversity of birds and at a  
187 global scale to consider how abiotic factors have shaped the evolution and distribution of a trait.  
188 We illustrate why such scale, scope, and depth is necessary to understand a classic example of an  
189 ecological trade-off. Thus, while our findings provide a framework for understanding the  
190 selective pressures shaping eggshell colours, they also provide insight into the forces driving  
191 pigmentation generally. We show that abiotic pressures such as temperature constrain the

192 expression of phenotypes, and may limit the role of alternative selective pressures in some places  
193 while those same traits may be less constrained in other places on Earth. Such explorations of the  
194 impact of climate on phenotypes<sup>28</sup>, particularly those inherently linked with survival<sup>29</sup>, are  
195 necessary if we wish to quantify climate change impacts. As temperatures rise in the Arctic<sup>30</sup>, the  
196 egg colours found in that region could be shifting from adaptive to maladaptive, which could  
197 result in a loss of biodiversity. Therefore, our findings provide a roadmap for identifying regions  
198 at greater risk due to increasing global temperatures and prioritizing conservation efforts. Thus,  
199 in addition to illustrating how abiotic factors have shaped trait diversity, our research outlines  
200 novel and unexplored consequences of anthropogenic climate change.

201

## 202 **Online content**

203 Any methods, additional references, Nature Research reporting summaries, source data, statements  
204 of data availability and associated accession codes are available at \_\_\_. Birdlife Range data can be  
205 requested at <http://datazone.birdlife.org/species/requestdis>. Digital Chart of the World basemap  
206 can be found at: [https://worldmap.harvard.edu/data/geonode:Digital\\_Chart\\_of\\_the\\_World](https://worldmap.harvard.edu/data/geonode:Digital_Chart_of_the_World). Natural  
207 Earth Data maps can be found at: <https://www.naturalearthdata.com/>. Worldclim temperature data  
208 is available at <http://worldclim.org/version2>. National Center for Atmospheric Research UV data  
209 can be found at: <https://www2.acom.ucar.edu/modeling/tuv-download>. Atlas of the Biosphere  
210 humidity data can be found at: <https://nelson.wisc.edu/sage/data-and-models/atlas/maps.php>.  
211 Köppen climate data can be found at <http://www.gloh2o.org/koppen/>.

212

## 213 **References**

- 214 1. Bakken, G. S., Vanderbilt, V. C., Buttermer, W. A. & Dawson, W. R. Avian eggs:  
215 thermoregulatory value of very high near- infrared reflectance. *Science* **200**, 321–323

- 216 (1978).
- 217 2. McAldowie, A. M. Observations on the development and the decay of the pigment layer  
218 on birds' eggs. *J. Anat. Physiol.* **20**, 225–237 (1886).
- 219 3. Ruxton, G. D. Comment on 'Vegetation height and egg coloration differentially affect  
220 predation rate and overheating risk: an experimental test mimicking a ground-nesting  
221 bird'. *Can. J. Zool.* **90**, 1359–1360 (2012).
- 222 4. Westmoreland, D., Schmitz, M. & Burns, K. E. Egg color as an adaptation for  
223 thermoregulation. *J. Field Ornithol.* **78**, 176–183 (2007).
- 224 5. Lahti, D. C. & Ardia, D. R. Shedding light on bird egg color: pigment as parasol and the  
225 dark car effect. *Am. Nat.* **187**, 547–563 (2016).
- 226 6. Gómez, J. *et al.* A trade-off between overheating and camouflage on shorebird eggshell  
227 colouration. *J. Avian Biol.* **47**, 346–353 (2016).
- 228 7. Kilner, R. M. The evolution of egg colour and patterning in birds. *Biol. Rev.* **81**, 383–406  
229 (2006).
- 230 8. Webb, D. R. Thermal tolerance of avian embryos: a review. *Condor* **89**, 874–898 (1987).
- 231 9. Boulton, R. L. & Cassey, P. How avian incubation behaviour influences egg surface  
232 temperatures: relationships with egg position, development and clutch size. *J. Avian Biol.*  
233 **43**, 289–296 (2012).
- 234 10. Martin, T. E., Auer, S. K., Bassar, R. D., Niklison, A. M. & Lloyd, P. Geographic  
235 variation in avian incubation periods and parental influences on embryonic temperature.  
236 *Evolution* **61**, 2558–2569 (2007).
- 237 11. Rohwer, V. G. & Law, J. S. Y. Geographic variation in nests of yellow warblers breeding  
238 in Churchill, Manitoba, and Elgin, Ontario. *Condor* **112**, 596–604 (2010).
- 239 12. Gorchein, A., Lim, C. K. & Cassey, P. Extraction and analysis of colourful eggshell  
240 pigments using HPLC and HPLC/electrospray ionization tandem mass spectrometry.  
241 *Biomed. Chromatogr.* **23**, 602–606 (2009).
- 242 13. Avilés, J. M., Stokke, B. G., Moksnes, A., Røskaft, E. & Møller, A. P. Environmental  
243 conditions influence egg color of reed warblers *Acrocephalus scirpaceus* and their  
244 parasite, the common cuckoo *Cuculus canorus*. *Behav. Ecol. Sociobiol.* **61**, 475–485  
245 (2007).
- 246 14. Magige, F. J., Moe, B. & Røskaft, E. The white colour of the ostrich (*Struthio camelus*)  
247 egg is a trade-off between predation and overheating. *J. Ornithol.* **149**, 323–328 (2008).
- 248 15. Troscianko, J., Wilson-Aggarwal, J., Stevens, M. & Spottiswoode, C. N. Camouflage  
249 predicts survival in ground-nesting birds. *Sci. Rep.* **6**, 19966 (2016).
- 250 16. Montevecchi, W. A. Field experiments on the adaptive significance of avian eggshell  
251 pigmentation. *Behaviour* **58**, 26–39 (1975).
- 252 17. Hanley, D., Grim, T., Cassey, P. & Hauber, M. E. Not so colourful after all: eggshell  
253 pigments constrain avian eggshell colour space. *Biol. Lett.* **11**, 20150087 (2015).
- 254 18. Pinkert, S., Brandl, R. & Zeuss, D. Colour lightness of dragonfly assemblages across  
255 North America and Europe. *Ecography* **40**, 1110–1117 (2017).
- 256 19. Maurer, G., Portugal, S. J. & Cassey, P. Review: an embryo's eye view of avian eggshell  
257 pigmentation. *J. Avian Biol.* **42**, 494–504 (2011).
- 258 20. Ishikawa, S. *et al.* Photodynamic antimicrobial activity of avian eggshell pigments. *FEBS*  
259 *Lett.* **584**, 770–4 (2010).
- 260 21. Moreno, J. & Osorno, J. L. Avian egg colour and sexual selection: does eggshell  
261 pigmentation reflect female condition and genetic quality? *Ecol. Lett.* **6**, 803–806 (2003).

- 262 22. Davies, N. B. & Brooke, M. D. L. An experimental study of co-evolution between the  
263 cuckoo, *Cuculus canorus*, and its hosts. II. Host egg markings, chick discrimination and  
264 general discussion. *J. Anim. Ecol.* **58**, 225–236 (1989).
- 265 23. Gosler, A. G., Connor, O. R. & Bonser, R. H. C. Protoporphyrin and eggshell strength:  
266 preliminary findings from a passerine bird. *Avian Biol. Res.* **4**, 214–223 (2011).
- 267 24. Wiemann, J., Yang, T.-R. & Norell, M. A. Dinosaur egg colour had a single evolutionary  
268 origin. *Nature* (2018). doi:10.1038/s41586-018-0646-5
- 269 25. Lee-Taylor, J. & Madronich, S. *Climatology of UV-A, UV-B, and erythral radiation at*  
270 *the Earth's surface, 1979-2000. NCAR Technical Note TN-474-STR* (2007).
- 271 26. West, A., Cassey, P. & Thomas, C. M. Microbiology of nests and eggs. in *Nests, eggs,*  
272 *and incubation: new ideas about avian reproduction* (eds. Deeming, D. C. & Reynolds, S.  
273 J.) 75–81 (Oxford University Press, 2015).
- 274 27. Cook, M. I., Beissinger, S. R., Toranzos, G. A., Rodriguez, R. A. & Arendt, W. J.  
275 Microbial infection affects egg viability and incubation behavior in a tropical passerine.  
276 *Behav. Ecol.* **16**, 30–36 (2005).
- 277 28. Morales-Castilla, I., Rodríguez, M. Á. & Hawkins, B. A. Deep phylogeny, net primary  
278 productivity, and global body size gradient in birds. *Biol. J. Linn. Soc.* **106**, 880–892  
279 (2012).
- 280 29. Kubelka, V. *et al.* Global pattern of nest predation is disrupted by climate change in  
281 shorebirds. *Science* **362**, 680–683 (2018).
- 282 30. Serreze, M. C. & Barry, R. G. Processes and impacts of Arctic amplification: a research  
283 synthesis. *Glob. Planet. Change* **77**, 85–96 (2011).
- 284

285 **Acknowledgements** We thank Long Island University for space and support for this project. We  
286 also thank K. Mendola, J. L. Cuthbert, and K. Dalto for their assistance, and S. Tettelbach, M. C.  
287 Stoddard, S. Madronich, and T.E. Lewis for helpful comments. We thank Mark Hauber (MEH)  
288 with assistance securing funding to collect eggshell spectra. The collection of the original dataset  
289 was partially funded by a Human Frontier Science Program (<http://www.hfsp.org/>) young  
290 investigators' grant (RGY0069/2007-C) and a Leverhulme Trust (<http://www.leverhulme.ac.uk/>)  
291 project grant (F/00 094/AX) to PC and MEH.

292

293 **Author contributions** The concept was developed by D.H., data was collected by D.H. and  
294 P.C., colour analyses were conducted by D.H and I.R., biogeographic models were developed  
295 and implemented by P.W., P.K, and D.H., the initial draft was prepared by P.W. and D.H., and  
296 all authors edited the paper.

297

298 **Competing interests** The authors declare no competing interests

299

### 300 **Additional information**

301 **Extended data** is available for this paper at [\\_](#).

302 **Correspondence and requests for materials** should be addressed to D.H.

303

## 304 METHODS

305 *Colour estimation:* We used spectral reflectance data of avian eggshells ( $n = 634$ ) spanning all  
306 avian orders excluding Eurypygiformes (two species: Kagu and Sunbittern), Leptosomiformes  
307 (one species: Cuckoo Roller), Mesitornithiformes (three Mesites species), and Pteroclidiformes  
308 (16 Sandgrouse species)<sup>1</sup>. Of those orders represented in our data,  $87\pm 4\%$  of the families within  
309 them were sampled. These reflectance data were smoothed using a locally weighted polynomial  
310 function. These data had previously been used to determine the extant variation in avian eggshell  
311 coloration<sup>17</sup> within the avian tetrahedral colour<sup>32,33</sup>. We then modelled avian perceived colour of  
312 each eggshell using a noise limited neural model to estimate quantum catch for each  
313 photoreceptor. We calculated relative photoreceptor and double cone quantum catch<sup>34</sup> assuming  
314 the average photoreceptor sensitivity of an ultraviolet sensitive bird and the double cones of the  
315 blue tit *Cyanistes caeruleus*. To provide a comparable objective measurement of perceived  
316 eggshell colours we used an ideal illuminant with equal irradiance across all wavelengths for  
317 these analyses. Then we constructed an opponent colour space, using these quantum catches to  
318 calculate responses to opponent channels corresponding with relatively short and long  
319 wavelength light<sup>35</sup>. Specifically, we calculated the coordinates of eggshell colours within an  
320 opponent space defined by perceived eggshell luminance (y axis), and by opponent channels  
321 corresponding with the perception of relatively short and long wavelength light<sup>35</sup> defined by  
322 eggshell quantum catches to calculate responses (x axis). Specifically,

$$323 \text{SU} = (q_s - q_u) / (q_s + q_u)$$

$$324 \text{LMS} = (0.5 (q_l + q_m) - q_s) / (0.5(q_l + q_m) + q_s)$$

325 where,  $q_u$ ,  $q_s$ ,  $q_m$ ,  $q_l$  represent the quantile catch of the ultraviolet, short, medium, and long  
326 wavelength-sensitive photoreceptors, respectively<sup>35</sup>. The difference between LMS and SU

327 (divided by 2) standardized all colour values to a minimum of  $-1$  and a maximum of  $+1$ ,  
328 corresponding with blue-green and brown respectively (Fig. 1). The eggshell luminance was  
329 standardized to the brightest value. Unlike previous analyses that quantified avian eggshell  
330 coloration<sup>17,36,37</sup>, this approach uses quantum catch from all four receptors, while providing a  
331 quantification of variation in coloration from blue-green to brown, along with a second  
332 dimension of capturing variation in perceived eggshell luminance (Fig. 1). Although species  
333 differ in their photoreceptor sensitivity, the coordinates within opponent colour spaces were  
334 calculated for the average ultraviolet- and violet-sensitive avian viewer, two broadly divergent  
335 types of avian vision<sup>38</sup>, were highly correlated (*colour*:  $\beta = 0.93$ ,  $CI_{0.95} = 0.88$  to  $0.92$ ,  $p <$   
336  $0.0001$ , Pagel's  $\lambda_{\max}=0.85$ ; *luminance*:  $\beta = 1.00$ ,  $CI_{0.95} = 1.00$  to  $1.00$ ,  $p < 0.0001$ , Pagel's  $\lambda_{\max}=$   
337  $0.85$ ; Extended Data Fig. 2). Our use of avian perceived colour and luminance is important for  
338 future studies involving conspecific signalling<sup>21</sup>, brood parasitism<sup>39</sup>, and avian predation<sup>40</sup>. Our  
339 calculated avian perceived colour and luminance relate to a measure of blue-green chroma (the  
340 sum of the reflectance within 450 and 550nm divided by the sum total reflectance within 300 and  
341 700nm) and brightness (the average reflectance within 300 to 700nm)<sup>41</sup> (*colour*:  $\beta = -0.97$ ,  $CI_{0.95}$   
342  $= -0.99$  to  $-0.95$ ,  $p < 0.0001$ ; *luminance*:  $\beta = 0.98$ ,  $CI_{0.95} = 0.98$  to  $0.99$ ,  $p < 0.0001$ ),  
343 respectively. We chose to quantify colour using an avian perceptual system because birds  
344 actively select eggs, and therefore these data have value for meta-replication when testing  
345 hypotheses related to avian signalling.

346

347 *Biogeographical sampling*: We downloaded bird distribution maps from Birdlife<sup>42</sup>, and buffered  
348 entirely oceanic ranges by 10 km using the 'Digital Chart of the World' base map<sup>43</sup> to restrict all  
349 ranges to land. We chose the 10 km buffer because it was well within one sampling area (see

350 below). Then, we removed all lakes from all sampled species bird ranges using a 1:10,000,000  
351 map of worldwide lakes from Natural Earth Data version 3.0.0<sup>44</sup>. We obtained environmental  
352 data from WorldClim<sup>45</sup>, National Center for Atmospheric Research<sup>25</sup> and the Atlas of the  
353 Biosphere<sup>46</sup> datasets. Next we randomly generated one nest every 10,000 km<sup>2</sup> within each  
354 species' breeding or resident range<sup>42</sup>. Each point was then assigned its species' colour and  
355 luminance value. We overlaid an equal area hexagonal discrete global grid (ISEA aperture 3,  
356 resolution 7,  $n = 7,158$ ), and within each hexagon (hereafter locales) we averaged both egg and  
357 environmental data. Köppen climate regions<sup>47</sup> were summarized to each locales' modal primary  
358 category (tropical, arid, temperate, cold, and polar). We pooled cold and polar regions to  
359 represent 'cool' regions, and pooled the remaining regions as 'other'. All biogeographic  
360 sampling was conducted using ArcGIS ArcMap version 10.5 (Esri, Redlands, CA).

361  
362 *Phylogenetic and geospatial analysis:* We accounted for the phylogenetic relatedness among  
363 birds by constructing a phylogenetic hypothesis using a sample of 9,999 fully resolved  
364 phylogenetic trees from a recent complete avian phylogeny<sup>48,49</sup>. Using these data, we calculated  
365 the Bayesian maximum credibility tree (Extended Data Fig. 3), using the mean branch lengths of  
366 the candidate set using DendroPy<sup>50</sup>, dropping 10% of trees as burn in. We then assigned all  
367 nodes an ancestral nest type, assuming equal rates using a maximum likelihood estimation<sup>51</sup>. For  
368 each locale, we calculated the phylogenetic mean colour and luminance for all birds, as well as  
369 birds nesting exclusively on the ground, in open nests, dome nests, cavities, or in mounds using  
370 the 'phyloMean' function in the 'motmot 2.0' package. We removed any locale that could not be  
371 phylogenetically controlled for (e.g., fewer than 3 species), which reduced our final sample size  
372 to 6,692 locales. Mean species richness across each climate region in our final dataset ( $n =$

373 6,692) were all greater than 15 (*tropical*:  $30.50 \pm 0.37$ , *arid*:  $24.75 \pm 0.42$ , *temperate*:  $36.22 \pm$   
374  $0.65$ , *cold*:  $40.28 \pm 0.47$ , *polar*:  $15.32 \pm 0.41$ ). Although phylogenetic signal<sup>52</sup> varied across  
375 geography (*colour*: Moran's I = 0.84,  $p < 0.0001$ , *luminance*: Moran's I = 0.89,  $p < 0.0001$ ),  
376 phylogenetic means and non-phylogenetic means were highly correlated (*colour*:  $R^2 = 0.90$ ,  $z =$   
377  $70.43$ ,  $p < 0.0001$ ; *luminance*:  $R^2 = 0.91$ ,  $z = 80.43$ ,  $p < 0.0001$ ; Extended Data Fig. 2a)  
378 suggesting that any bias introduced by controlling for full phylogenetic signal (Brownian  
379 motion) was minimal. Significance testing for Moran's I was two tailed.

380

381 *Thermoregulation and colour*: We tested whether the thermoregulatory properties of the egg  
382 could be predicted by eggshell colour and luminance using domestic chicken *Gallus gallus*  
383 *domesticus* eggs (Carrol's, Pete and Jerry's, and Stop and Shop) under natural illumination  
384 conditions. These eggs ( $n = 48$ ) were either dark brown, light brown, blue-green, or white. Each  
385 egg's mass was recorded using a microbalance (Ohaus Adventure Pro, model AV114C,  $\pm$   
386  $0.0001\text{g}$ ) to the nearest centigram, their surface reflectance was recorded using an Ocean Optics  
387 Jaz spectrophotometer (Ocean Optics, Jaz, Dunedin, Florida, USA), and then each egg's  
388 coordinates were calculated within the opponent space. The eggs were then sorted into 12 groups  
389 of four, each containing an egg of each colour in a random order. These eggs were acclimated to  
390 room temperature  $\sim 24.1$  °C overnight, and then placed in direct sunlight on 24 August 2018 at  
391  $27^\circ\text{C}$ . We measured temperature using a thermal imaging camera (FLIR Infra-Cam) at 15-minute  
392 intervals for 75 minutes spanning solar noon (30 min prior to 45 minutes after solar noon). Mean  
393 egg temperature for each egg was calculated using calibrated thermal images in ImageJ<sup>53</sup>. To  
394 verify that estimates of surface temperature measured by the FLIR Infra-Cam correspond with  
395 internal temperatures, we inserted a Omega type T thermocouple (Omega SSRTC-TT-T-24-36)



396 2.5 cm into a new set of dark brown ( $n = 3$ ) and white eggs ( $n = 3$ ) and recorded internal  
397 temperature using a thermocouple logger (Omega HH506RA); internal and external temperature  
398 were highly related ( $r = 0.92$ ,  $CI_{0.95} = 0.83$  to  $0.95$ ,  $p < 0.0001$ ; Extended Data Fig. 1b).

399  
400 *Statistical analysis:* We accounted for spatial autocorrelation in both dependent and independent  
401 variables using a spatial Durbin error model, using first and second order Queen's contiguity<sup>54</sup>  
402 weighting and lower-upper matrix decomposition. A first order Queen's contiguity considers all  
403 neighbours for each locale, while in this case a second contiguity considers all neighbouring  
404 locales as well as all their neighbours (weights were roughly equivalent to  $\sim 350$  km). We use  
405 AICc<sup>55,56</sup> to determine whether the model weighted by the first or second order contiguity better  
406 explained our data, and we report the model with the lowest AICc. We calculate and report total  
407 impact statistics (e.g., z scores and two tailed p values) and Nagelkerke pseudo- $R^2$  for each  
408 spatial Durbin error model. All isolated locales and locales with missing information were  
409 removed from weight files, which is a requirement of the spatial Durbin error model. This  
410 resulted in datasets of eggshell coloration and luminance of the eggs from locales containing all  
411 birds ( $n = 6,692$ ), ground nesting birds ( $n = 6,539$ ), open nesting birds ( $n = 6,475$ ), and cavity  
412 nesting birds ( $n = 6,557$ ). Phylogenetic mean colour and luminance for each nest type was  
413 considered in the presence of all possible nest types at each locale, rather than truncating the  
414 dataset. Dome nesting birds and mound builders were retained for these calculations (Extended  
415 Data Fig. 3), but we do not have predictions for these groups so we do not explore their  
416 independent relationships. We predicted the rate of heating of chicken eggs under natural  
417 incident solar radiation based on colour, luminance, and mass using a general linear model.

418

419 **Data availability**

420 The data and codes that support the findings of this study are available from the corresponding  
421 author upon request.

422

- 423 31. Hanley, D., Grim, T., Cassey, P. & Hauber, M. E. Data from: Not so colourful after all:  
424 eggshell pigments constrain avian eggshell colour space. *Dryad Digit Repos*  
425 <https://doi.org/10.5061/dryad.2q3r2> (2015).
- 426 32. Stoddard, M. C. & Prum, R. O. Evolution of avian plumage color in a tetrahedral color  
427 space: a phylogenetic analysis of new world buntings. *Am. Nat.* **171**, 755–776 (2008).
- 428 33. Goldsmith, T. H. Optimization, constraint, and history in the evolution of eyes. *Q. Rev.*  
429 *Biol.* **65**, 281–322 (1990).
- 430 34. Hart, N. S. The visual ecology of avian photoreceptors. *Prog. Retin. Eye Res.* **20**, 675–703  
431 (2001).
- 432 35. Osorio, D., Vorobyev, M. & Jones, C. D. Colour vision of domestic chicks. *J. Exp. Biol.*  
433 **202**, 2951–2959 (1999).
- 434 36. Dainson, M., Hauber, M. E., López, A. V., Grim, T. & Hanley, D. Does contrast between  
435 eggshell ground and spot coloration affect egg rejection? *Sci. Nat.* **104**, 54 (2017).
- 436 37. Hanley, D. *et al.* Egg discrimination along a gradient of natural variation in eggshell  
437 coloration. *Proc. R. Soc. B* **284**, 20162592 (2017).
- 438 38. Ödeen, A., Håstad, O. & Alström, P. Evolution of ultraviolet vision in the largest avian  
439 radiation - the passerines. *BMC Evol. Biol.* **11**, 313 (2011).
- 440 39. Spottiswoode, C. N. & Stevens, M. Visual modeling shows that avian host parents use  
441 multiple visual cues in rejecting parasitic eggs. *Proc. Natl. Acad. Sci. U. S. A.* **107**, 8672–  
442 8676 (2010).
- 443 40. Blanco, G. & Bertellotti, M. Differential predation by mammals and birds: implications  
444 for egg-colour polymorphism in a nomadic breeding seabird. *Biol. J. Linn. Soc.* **75**, 137–  
445 146 (2002).
- 446 41. Hanley, D., Cassey, P. & Doucet, S. M. . Parents, predators, parasites, and the evolution of  
447 eggshell colour in open nesting birds. *Evol. Ecol.* **27**, 593–617 (2013).
- 448 42. BirdLife International and NatureServe. Bird species distribution maps of the world.  
449 Version 5.0. BirdLife International. Cambridge, UK and NatureServe, Arlington, USA  
450 (2015).
- 451 43. Defense Mapping Agency (DMA). Digital Chart of the World. Fairfax, Virginia (1992).
- 452 44. Kelso, N. V. & Patterson, T. Introducing natural Earth data - [naturalearthdata.com](http://naturalearthdata.com). *Geogr.*  
453 *Tech.* 82–89 (2010).
- 454 45. Fick, S. E. & Hijmans, R. J. WorldClim 2: new 1-km spatial resolution climate surfaces  
455 for global land areas. *Int. J. Climatol.* **37**, 4302–4315 (2017).
- 456 46. Mitchell, T. D., Carter, T. R., Jones, P. D., Hulme, M. & New, M. *A comprehensive set of*  
457 *high-resolution grids of monthly climate for Europe and the globe: the observed record*  
458 *(1901–2000) and 16 scenarios (2001–2100)*. Tyndall Centre for Climate Change  
459 *Research Working Paper 55* (2004).
- 460 47. Beck, H. E. *et al.* Data Descriptor: Present and future Köppen-Geiger climate  
461 classification maps at 1-km resolution. *Sci. Data* **5**, 180214 (2018).
- 462 48. Hackett, S. J. *et al.* A phylogenomic study of birds reveals their evolutionary history.  
463 *Science* **320**, 1763–1768 (2008).
- 464 49. Jetz, W., Thomas, G. H., Joy, J. B., Hartmann, K. & Mooers, A. O. The global diversity of

- 465 birds in space and time. *Nature* **491**, 444–448 (2012).
- 466 50. Sukumaran, J. & Holder, M. T. DendroPy: a Python library for phylogenetic computing.  
467 *Bioinformatics* **26**, 1569–1571 (2010).
- 468 51. Pagel, M. Detecting correlated evolution on phylogenies: a general method for  
469 comparative analysis of discrete characters. *Proc. R. Soc. B* **255**, 37–45 (1994).
- 470 52. Pagel, M. D. Inferring the historical patterns of biological evolution. *Nature* **401**, 877–84  
471 (1999).
- 472 53. Schindelin, J. *et al.* Fiji: An open-source platform for biological-image analysis. *Nat.*  
473 *Methods* **9**, 676–682 (2012).
- 474 54. Anselin, L. & Bera, K. B. Spatial dependence in linear regression models with an  
475 introduction to spatial econometrics. *Stat. Textb. Monogr.* **155**, 237–290 (1998).
- 476 55. Burnham, K. P., Anderson, D. R. & Huyvaert, K. P. AIC model selection and multimodel  
477 inference in behavioral ecology: some background, observations, and comparisons. *Behav.*  
478 *Ecol. Sociobiol.* **65**, 23–35 (2011).
- 479 56. Akaike, H. A new look at the statistical model identification. *IEEE Trans. Autom. Control*  
480 **19**, 716–723 (1974).
- 481 57. Rohlf, F. J. A comment on phylogenetic correction. *Evolution* **60**, 1509–1515 (2006).
- 482
- 483

484

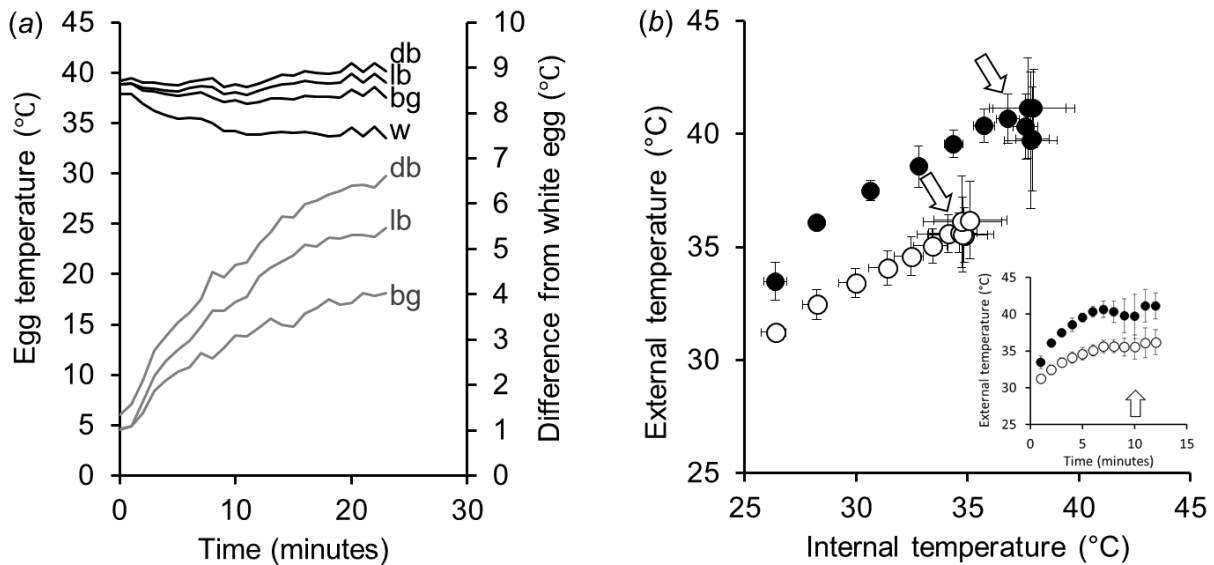

485

486

487

488

489

490

491

492

493

494

495

496

497

**Extended Data Fig. 1. | Egg temperatures.** Eggshell surface temperatures under **a**, natural ambient light conditions (24.1 °C) for dark brown (db), light brown (lb), blue-green (bg), and white (w) domestic chicken eggs ( $n = 12$ ). All eggs were heated together overnight to 37°C in a Powers Scientific Inc. (model DROS33SD) incubator on locally sourced topsoil, sand, and fallen leaves to approximate a scratch nest. Over this trial, brown eggs retained their initial temperature, while blue-green eggs lost temperature slowly, and white eggs lost temperature rapidly. We measured egg temperatures every minute for 24 minutes using a FLIR Infra-Cam. After 24 minutes, dark brown eggs were 7°C warmer than white eggs (grey lines, second y axis). A new set of eggs' external surface temperatures were **b**, related to their internal temperatures. Dark brown (filled dots,  $n = 3$ ) and white (open dots,  $n = 3$ ) eggs were left under natural ambient light conditions (33.9 °C; see Methods for details). The external temperatures change more rapidly than internal temperatures when wind increases convective cooling (arrows), as experienced 10 minutes into this trial (inset).

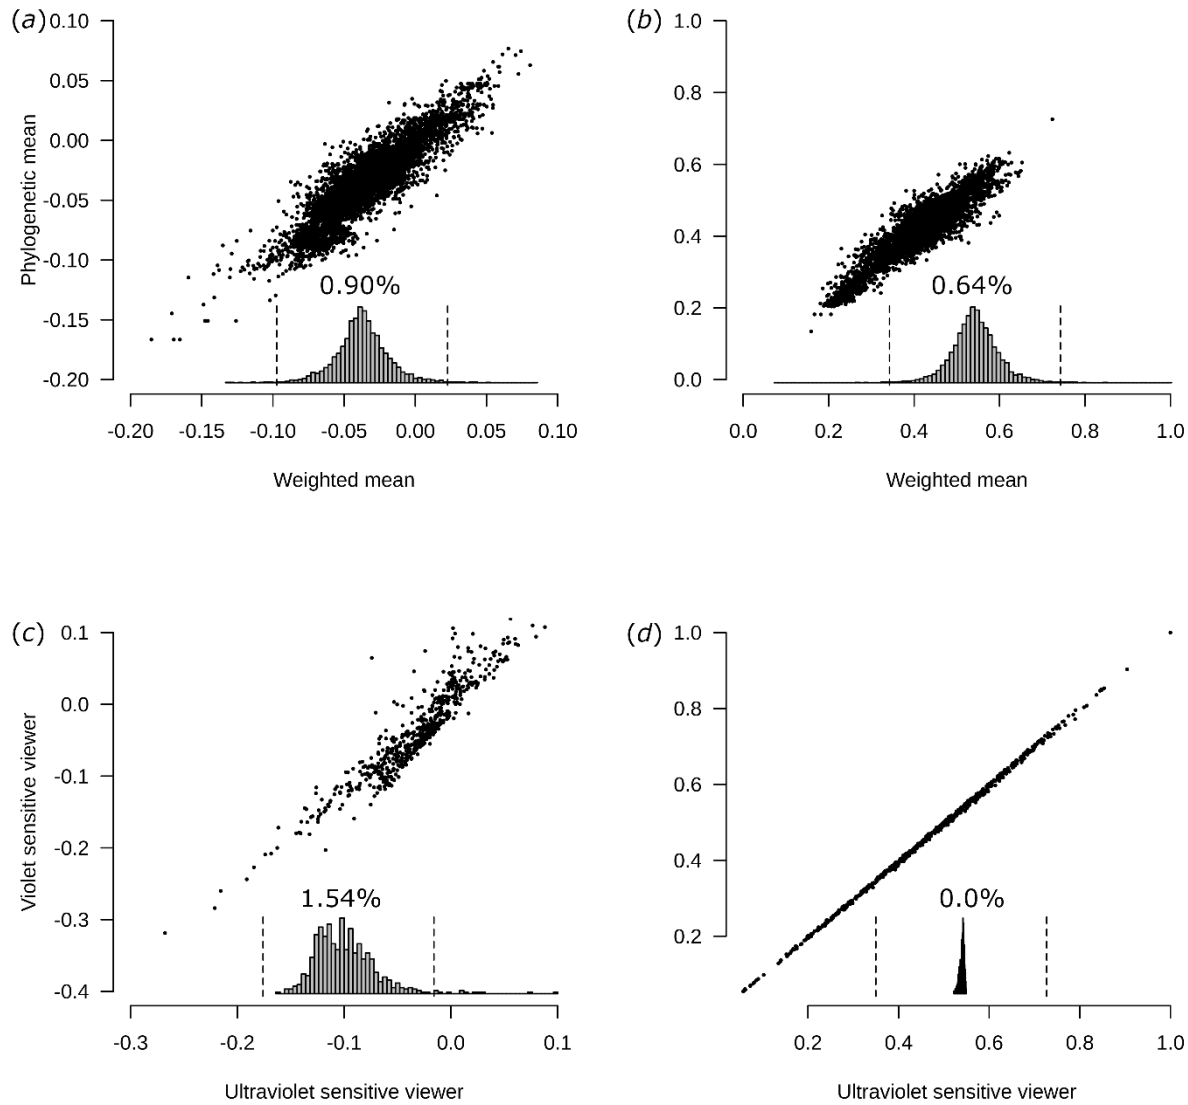

498  
499

500 **Extended Data Fig. 2. | Comparison of other methods.** Relationships between the phylogenetic  
501 and weighted means for **a**, colour and **b**, luminance, as well as the relationship between the **c**, colour  
502 and **d**, luminance components of the opponent colour space calculated for the average violet- and  
503 ultraviolet-sensitive avian viewer. Here the weighted means were calculated using an intercept-only  
504 phylogenetic generalized least squares, where estimates correspond with weighted means<sup>57</sup> but the  
505 maximum likelihood value for Pagel's lambda<sup>52</sup> is calculated for each locale. These figures illustrate  
506 the maximum degree of error introduced into our analyses (residuals) by our application of  
507 phylogenetic means and ultraviolet-sensitive visual systems. In both cases, more fine-tuned variation  
508 likely exists in our data, but these illustrate extremes (e.g., no phylogenetic correction versus full  
509 Brownian motion, and two common but broadly divergent visual systems). The inset histograms  
510 represent the residuals from each's respective tests (see Results). Units are scaled, and presented on a  
511 comparable scale ( $-2.5$  to  $2.5$  standard deviations) and dashed lines represent  $-1$  and  $1$  standard  
512 deviation, respectively. The percentages above each histogram represent deviations more extreme  
513 than 1 standard deviation.

514  
515  
516

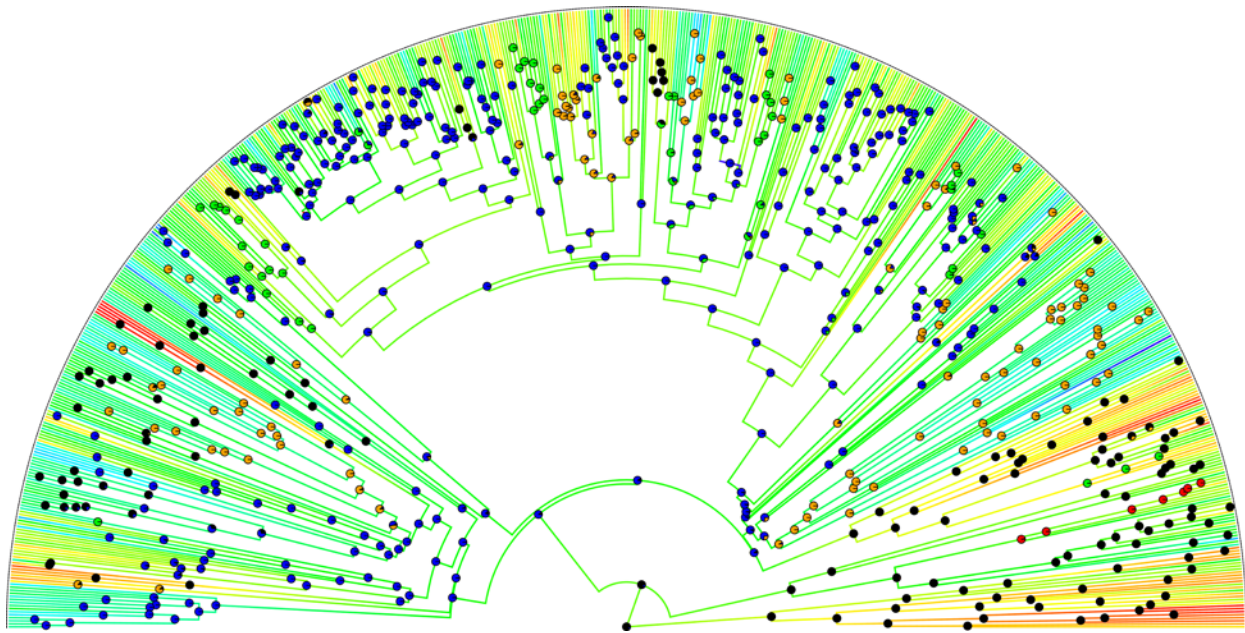

517  
518 **Extended Data Fig. 3. | Phylogenetic relationships.** The maximum clade credibility tree used in  
519 this study. Here we plot branch lengths in continuous coloration representing avian perceived  
520 eggshell luminance from dark (red) to bright (blue). At each node, we illustrate pie charts  
521 representing the most likely ancestral state for nest types: ground nesting (black), cup nesting (blue),  
522 dome nesting (green), cavity nesting (orange), and mound nesting (red).  
523
